# Supplementary material for: CD56bright natural killer regulatory cells in filgrastim primed donor blood or marrow products regulate chronic graft-versus-host disease: the Canadian Blood and Marrow Transplant Group randomized 0601 study results
Source: PubMed Central journal article supplement — Haematologica. 2017 Sep 21;102(11):1936–46. doi: 10.3324/haematol.2017.170928 (PMC5664398; doi:10.3324/haematol.2017.170928), 2017-11
Supplement: 2017.170928.KARIMINIA_SUPPL.pdf [file 2017.170928.KARIMINIA_SUPPL.pdf]

## CD56<sup>bright</sup> natural killer regulatory cells in filgrastim primed donor blood or marrow products regulate chronic graft-versus-host disease: the Canadian Blood and Marrow Transplant Group randomized 0601 study results

Amina Kariminia,<sup>1</sup> Sabine Ivison,<sup>1</sup> Bernard Ng,<sup>2</sup> Jacob Rozmus,<sup>1</sup> Susanna Sung,<sup>1</sup> Avani Varshney,<sup>1</sup> Mahmoud Aljurf,<sup>3</sup> Sylvie Lachance,<sup>4</sup> Irwin Walker,<sup>5</sup> Cindy Toze,<sup>6</sup> Jeff Lipton,<sup>7</sup> Stephanie J. Lee,<sup>8</sup> Jeff Szer,<sup>9</sup> Richard Doocey,<sup>10</sup> Ian Lewis,<sup>11</sup> Clayton Smith,<sup>12</sup> Naeem Chaudhri,<sup>3</sup> Megan K. Levings,<sup>13</sup> Raewyn Broady,<sup>6</sup> Gerald Devins,<sup>7</sup> David Szwajcer,<sup>14</sup> Ronan Foley,<sup>5</sup> Sara Mostafavi,<sup>2</sup> Steven Pavletic,<sup>15</sup> Donna A. Wall,<sup>16</sup> Stephan Couban,<sup>17</sup> Tony Panzarella<sup>7</sup> and Kirk R. Schultz<sup>1</sup>

<sup>1</sup>Michael Cuccione Childhood Cancer research Program, BC Children's Hospital, Department of Pediatrics, University of British Columbia, Vancouver, BC, Canada; <sup>2</sup>Department of Statistics, University of British Columbia, Centre for Molecular Medicine and Therapeutics, Vancouver, BC, Canada; <sup>3</sup>King Faisal Specialist Hospital and Research Center, Riyadh, Kingdom of Saudi Arabia; <sup>4</sup>Hôpital Maisonneuve-Rosemont, Université de Montréal, QC, Canada; <sup>5</sup>Hamilton Health Sciences Centre and McMaster University, Hamilton, ON, Canada; <sup>6</sup>Leukemia/Bone Marrow Transplant Program of BC, Vancouver General Hospital, British Columbia Cancer Agency and the University of British Columbia, Vancouver, BC, Canada; <sup>7</sup>Princess Margaret Cancer Centre University of Toronto, ON, Canada; <sup>8</sup>Fred Hutchinson Cancer Research Centre, Seattle, WA, USA; <sup>9</sup>Royal Melbourne Hospital and University of Melbourne, Australia; <sup>10</sup>Auckland City and Starship Children's Hospital, Auckland, New Zealand; <sup>11</sup>Institute of Medical and Veterinary Sciences, Adelaide, Australia; <sup>12</sup>General Hematology, Blood Cancers and Bone Marrow Transplant Program, University of Colorado Hospital, Aurora, CO, USA; <sup>13</sup>BC Children's Hospital Research Institute and Department of Surgery, University of British Columbia, Vancouver, BC, Canada; <sup>14</sup>CancerCare Manitoba, Winnipeg, MB, Canada; <sup>15</sup>Center for Cancer Research, National Cancer Institute, Bethesda, MD, USA; <sup>16</sup>The Hospital for Sick Children and University of Toronto, ON, Canada and <sup>17</sup>Nova Scotia Health Authority and Dalhousie University, Halifax, NS, Canada

©2017 Ferrata Storti Foundation. This is an open-access paper. doi:10.3324/haematol.2017.170928

Received: April 15, 2017.

Accepted: September 15, 2017.

Pre-published: September 21, 2017.

Correspondence: kschoultz@mail.ubc.ca

| <b>Supplemental Table 1. Logistic regression on all markers.</b>                                          |                                                                                 |                |               |            |            |
|-----------------------------------------------------------------------------------------------------------|---------------------------------------------------------------------------------|----------------|---------------|------------|------------|
| <b>Marker</b>                                                                                             | <b>Phenotyping</b>                                                              | <b>p-value</b> | <b>Median</b> | <b>Min</b> | <b>Max</b> |
| Total Lymphocyte count infused (x 10 <sup>8</sup> ) /Kg recipient                                         |                                                                                 | 0.49           | 6.90          | 0.94       | 17.1       |
| Total Lymphocytes infused (x 10 <sup>8</sup> )                                                            |                                                                                 | 0.25           | 1.70          | 0          | 6.4        |
| % of Lymphocytes per CD45 <sup>+</sup>                                                                    |                                                                                 | 0.35           | 25.1          | 8.9        | 55.0       |
| Total # of CTL infused (x 10 <sup>8</sup> )/Kg recipient                                                  | CD3 <sup>+</sup> CD8 <sup>+</sup>                                               | 0.35           | 0.27          | 0          | 1.6        |
| % of CTL/total lymphocytes in donor product                                                               | CD3 <sup>+</sup> CD8 <sup>+</sup>                                               | 0.84           | 19.2          | 4.7        | 70.8       |
| Total granzymeB <sup>+</sup> Perforin <sup>+</sup> CTL infused (x10 <sup>8</sup> )/Kg recipient           | CD3 <sup>+</sup> CD8 <sup>+</sup> GranzymeB <sup>+</sup> Perforin <sup>+</sup>  | 0.41           | 0.03          | 0          | 0.91       |
| % of GranzymeB <sup>+</sup> Perforin <sup>+</sup> CTL/ total lymphocytes in donor product                 | CD3 <sup>+</sup> CD8 <sup>+</sup> GranzymeB <sup>+</sup> Perforin <sup>+</sup>  | 0.87           | 0.02          | 0.0003     | 0.7        |
| % of GranzymeB <sup>+</sup> Perforin <sup>+</sup> CTL/total CTL                                           | CD3 <sup>+</sup> CD8 <sup>+</sup> GranzymeB <sup>+</sup> Perforin <sup>+</sup>  | 0.79           | 10.40         | 0.20       | 56.1       |
| Total # of Granzyme <sup>+</sup> Perforin <sup>+</sup> NK cells infused (x 10 <sup>8</sup> )/Kg recipient | CD3 <sup>+</sup> CD56 <sup>+</sup> GranzymeB <sup>+</sup> Perforin <sup>+</sup> | 0.61           | 0.06          | 0          | 0.74       |
| % of Granzyme <sup>+</sup> Perforin <sup>+</sup> NK cells /total lymphocytes                              | CD3-CD56 <sup>+</sup> GranzymeB <sup>+</sup> Perforin <sup>+</sup>              | 0.63           | 0.04          | 0          | 0.32       |
| % of Granzyme <sup>+</sup> Perforin <sup>+</sup> NK cells/total NK cells                                  | CD3-CD56 <sup>+</sup> GranzymeB <sup>+</sup> Perforin <sup>+</sup>              | 0.16           | 55.00         | 3.50       | 96.0       |
| Total number of CD56 <sup>bright</sup> cells infused /Kg recipient                                        | CD3-CD56 <sup>bright</sup>                                                      | 0.21           | 0.01          | 0          | 0.071      |
| <b>%CD56<sup>bright</sup> NK cells (NK<sub>reg</sub>)/total lymphocytes</b>                               | CD3-CD56 <sup>bright</sup>                                                      | <b>0.003</b>   | 0.39          | 0.0199     | 2.83       |
| Total number of NK <sub>reg</sub> cells infused (x 10 <sup>8</sup> )/Kg recipient                         | CD3-CD56 <sup>+</sup>                                                           | 0.64           | 0.10          | 0          | 1.81       |
| % of NK cells /total lymphocytes in donor product                                                         | CD3-CD56 <sup>+</sup>                                                           | 0.94           | 7.20          | 2.20       | 78.0       |
| Total B cells infused (x 10 <sup>8</sup> )/Kg recipient                                                   | CD19 <sup>+</sup>                                                               | 0.21           | 0.22          | 0.018      | 1.40       |
| % of B cells/Lymphocytes in donor product                                                                 | CD19 <sup>+</sup>                                                               | 0.36           | 13.35         | 2.25       | 38.1       |
| <b>Total # of memory B-cells infused (x 10<sup>8</sup>)/Kg recipient</b>                                  | CD19 <sup>+</sup> CD27 <sup>+</sup>                                             | <b>0.03</b>    | 0.03          | 0          | 0.22       |
| % of memory B cells /total lymphocytes in donor product                                                   | CD19 <sup>+</sup> CD27 <sup>+</sup>                                             | 0.14           | 2.00          | 0.37       | 10.1       |
| Total # of Immature B cells infused (x 10 <sup>8</sup> )/Kg recipient                                     | CD19 <sup>+</sup> CD27-IgD <sup>-</sup> CD10 <sup>+</sup>                       | 0.84           | 0.02          | 0          | 0.088      |
| % of immature B cells /total lymphocytes in donor product                                                 | CD19 <sup>+</sup> CD27-IgD <sup>-</sup> CD10 <sup>+</sup>                       | 0.50           | 0.01          | 0.0019     | 0.073      |
| Ratio of Immature to mature B cells                                                                       | CD19 <sup>+</sup> CD27-IgD <sup>-</sup> CD10 <sup>+</sup> /CD19 <sup>+</sup>    | 0.10           | 0.004         | 0          | 0.06       |
| Percentage of immature B cells/CD19 <sup>+</sup> B cells in donor product                                 | CD27-IgD <sup>-</sup> CD10 <sup>+</sup> /CD19 <sup>+</sup>                      | 0.23           | 7.85          | 1.70       | 45.70      |
| Total # of T cells infused (x 10 <sup>8</sup> )/Kg recipient                                              | CD3 <sup>+</sup>                                                                | 0.57           | 1.22          | 0.10       | 4.46       |
| Total # of CD4 <sup>+</sup> T cells infused (x 10 <sup>8</sup> )/Kg recipient                             | CD3 <sup>+</sup> CD4 <sup>+</sup>                                               | 0.79           | 1.32          | 0.11       | 3.98       |
| % of CD4 <sup>+</sup> T cells /total lymphocytes in donor product                                         | CD3 <sup>+</sup> CD4 <sup>+</sup>                                               | 0.58           | 80.80         | 29.20      | 95.28      |
| % of CD4 <sup>+</sup> T cells /CD3 <sup>+</sup> T cells in donor product                                  | CD3 <sup>+</sup> CD4 <sup>+</sup>                                               | 0.12           | 68.00         | 41.2       | 85.7       |
| Total # of T <sub>reg</sub> cells infused (x 10 <sup>8</sup> )/Kg recipient                               | CD3 <sup>+</sup> CD4 <sup>+</sup> CD25 <sup>hi</sup>                            | 0.38           | 0.029         | 0.003      | 0.10       |
| % of CD4 <sup>+</sup> CD25 <sup>hi</sup> T <sub>reg</sub> cells /total lymphocytes in donor product       | CD3 <sup>+</sup> CD4 <sup>+</sup> CD25 <sup>hi</sup>                            | 0.39           | 0.017         | 0.007      | 0.05       |

|                                                                                                                                             |                                                                                               |              |       |        |      |
|---------------------------------------------------------------------------------------------------------------------------------------------|-----------------------------------------------------------------------------------------------|--------------|-------|--------|------|
| % of Treg cells /CD4 <sup>+</sup> CD25 <sup>hi</sup> T cells in donor product                                                               | CD3 <sup>+</sup> CD4 <sup>+</sup> CD25 <sup>hi</sup>                                          | 0.93         | 2.60  | 1.0    | 6.5  |
| Total number of CD4 <sup>+</sup> FOXP3 <sup>+</sup> Treg cells infused/Kg recipient                                                         | CD3 <sup>+</sup> CD4 <sup>+</sup> FOXP3 <sup>+</sup>                                          | 0.36         | 0.032 | 0.004  | 0.2  |
| % of CD4 <sup>+</sup> FOXP3 <sup>+</sup> T <sub>reg</sub> cells /total lymphocytes in donor product                                         | CD3 <sup>+</sup> CD4 <sup>+</sup> FOXP3 <sup>+</sup>                                          | 0.10         | 0.022 | 0.007  | 0.05 |
| % of CD4 <sup>+</sup> FOXP3 <sup>+</sup> / CD3 <sup>+</sup>                                                                                 | CD4 <sup>+</sup> FOXP3 <sup>+</sup>                                                           | 0.20         | 3.00  | 1.00   | 7.00 |
| Total CD3 <sup>+</sup> CD4 <sup>+</sup> CD25 <sup>hi</sup> FOXP3 <sup>+</sup> T <sub>reg</sub> infused (x10 <sup>8</sup> ) /Kg of recipient | CD3 <sup>+</sup> CD4 <sup>+</sup> /CD25 <sup>hi</sup> FOXP3 <sup>+</sup>                      | 0.36         | 0.038 | 0      | 0.15 |
| % of CD3 <sup>+</sup> CD4 <sup>+</sup> CD25 <sup>hi</sup> FOXP3 <sup>+</sup> per lymphocytes                                                | CD3 <sup>+</sup> CD4 <sup>+</sup> /CD25 <sup>hi</sup> FOXP3 <sup>+</sup>                      | 0.14         | 0.005 | 0.0009 | 0.02 |
| % of CD25 <sup>hi</sup> FOXP3 <sup>+</sup> per CD3 <sup>+</sup> CD4 <sup>+</sup>                                                            | CD25 <sup>hi</sup> FOXP3 <sup>+</sup> /CD3 <sup>+</sup> CD4 <sup>+</sup>                      | 0.17         | 3.25  | 1.1    | 6.3  |
| Total activated T <sub>reg</sub> infused (x10 <sup>8</sup> ) /Kg of recipient                                                               | CD3 <sup>+</sup> CD4 <sup>+</sup> /CD25 <sup>hi</sup> FOXP3 <sup>+</sup> /CD45RA <sup>-</sup> | 0.38         | 0.05  | 0      | 0.2  |
| % of memory T <sub>reg</sub> per lymphocytes                                                                                                | CD3 <sup>+</sup> CD4 <sup>+</sup> /CD25 <sup>hi</sup> FOXP3 <sup>+</sup> /CD45RA <sup>-</sup> | 0.14         | 0.007 | 0.001  | 0.02 |
| % of memory T <sub>reg</sub> per CD3 <sup>+</sup> CD4 <sup>+</sup>                                                                          | CD25 <sup>hi</sup> FOXP3 <sup>+</sup> CD45RA <sup>-</sup> /CD3 <sup>+</sup> CD4 <sup>+</sup>  | 0.23         | 4.15  | 1.0    | 7.7  |
| Total naïve T <sub>reg</sub> infused (x10 <sup>8</sup> ) /Kg of recipient                                                                   | CD3 <sup>+</sup> CD4 <sup>+</sup> /CD25 <sup>hi</sup> FOXP3 <sup>+</sup> /CD45RA <sup>+</sup> | 0.65         | 0.006 | 0      | 0.03 |
| % of naïve T <sub>reg</sub> per lymphocytes                                                                                                 | CD3 <sup>+</sup> CD4 <sup>+</sup> /CD25 <sup>hi</sup> FOXP3 <sup>+</sup> /CD45RA <sup>+</sup> | 0.51         | 0.004 | 0      | 0.03 |
| % of naïve T <sub>reg</sub> per CD3 <sup>+</sup> CD4 <sup>+</sup>                                                                           | CD25 <sup>hi</sup> FOXP3 <sup>+</sup> CD45RA <sup>+</sup> /CD3 <sup>+</sup> CD4 <sup>+</sup>  | 0.56         | 0.50  | 0.1    | 4.0  |
| Total of memory T-cells infused (x10 <sup>8</sup> ) /Kg of recipient                                                                        | CD3 <sup>+</sup> CD45RA <sup>-</sup>                                                          | 0.40         | 0.65  | 0.06   | 3.0  |
| % of memory T-cells per lymphocytes                                                                                                         | CD3 <sup>+</sup> CD45RA <sup>-</sup>                                                          | 0.65         | 34.50 | 14.2   | 73.4 |
| Total of memory T-cells infused (x10 <sup>8</sup> ) /Kg of recipient                                                                        | CD3 <sup>+</sup> CD45RA <sup>-</sup>                                                          | 0.39         | 0.50  | 0.04   | 2.49 |
| % of memory CD4 <sup>+</sup> per lymphocytes                                                                                                | CD3 <sup>+</sup> CD4 <sup>+</sup> CD45RA <sup>-</sup>                                         | 0.91         | 39.90 | 17.7   | 62.0 |
| Total of Th1 cells infused (x10 <sup>8</sup> ) /Kg of recipient                                                                             | CD3 <sup>+</sup> CD4 <sup>+</sup> IFNγ <sup>+</sup>                                           | 0.61         | 0.014 | 0      | 0.3  |
| % of Th1 cells /total lymphocytes                                                                                                           | CD3 <sup>+</sup> CD4 <sup>+</sup> IFNγ <sup>+</sup>                                           | 0.11         | 0.013 | 0.0000 | 0.08 |
| <b>% of CD4<sup>+</sup>IFNγ<sup>+</sup> cells / total CD3<sup>+</sup></b>                                                                   | <b>CD4<sup>+</sup>IFNγ<sup>+</sup>/CD3<sup>+</sup></b>                                        | <b>0.002</b> | 8.34  | 0.01   | 30.0 |
| Total of Th2 (x10 <sup>8</sup> ) /Kg of recipient                                                                                           | CD3 <sup>+</sup> CD4 <sup>+</sup> IL-4 <sup>+</sup>                                           | 0.94         | 0.009 | 0.0003 | 0.08 |
| % of Th2 per lymphocytes                                                                                                                    | CD3 <sup>+</sup> CD4 <sup>+</sup> IL-4 <sup>+</sup>                                           | 0.56         | 0.006 | 0.0005 | 0.04 |
| % of CD4 <sup>+</sup> IL-4 <sup>+</sup> per CD3 <sup>+</sup>                                                                                | CD4 <sup>+</sup> IL-4 <sup>+</sup> /CD3 <sup>+</sup>                                          | 0.42         | 0.96  | 0.08   | 6.0  |
| % of Th17 T cells infused (x 10 <sup>8</sup> ) /Kg recipient                                                                                | CD3 <sup>+</sup> CD4 <sup>+</sup> IL-17 <sup>+</sup>                                          | 0.86         | 0.004 | 0.0006 | 0.09 |
| % of Th17 T cells infused /total lymphocytes in donor product                                                                               | CD3 <sup>+</sup> CD4 <sup>+</sup> IL-17 <sup>+</sup>                                          | 0.23         | 0.003 | 0.0003 | 0.01 |
| % of CD4 <sup>+</sup> IL-17 <sup>+</sup> per CD3 <sup>+</sup>                                                                               | CD4 <sup>+</sup> IL-17 <sup>+</sup> /CD3 <sup>+</sup>                                         | 0.12         | 0.42  | 0.05   | 2.00 |
| Total number of activated B cells infused (x10 <sup>8</sup> ) /Kg recipient                                                                 | CD19 <sup>+</sup> CD21 <sup>lo</sup>                                                          | 0.35         | 0.01  | 0      | 0.11 |
| % of activated B cells /total lymphocytes in donor product                                                                                  | CD19 <sup>+</sup> CD21 <sup>lo</sup>                                                          | 0.23         | 0.007 | 0.0009 | 0.04 |
| Activated B cells /total CD19 <sup>+</sup>                                                                                                  | CD19 <sup>+</sup> CD21 <sup>lo</sup> /CD19 <sup>+</sup>                                       | 0.37         | 2.80  | 0.30   | 13.5 |
| % of TLR9 <sup>hi</sup> B cells infused (x 10 <sup>8</sup> ) /Kg recipient                                                                  | CD19 <sup>+</sup> TLR9 <sup>hi</sup>                                                          | 0.23         | 0.007 | 0.0000 | 0.07 |
| % of TLR9 <sup>hi</sup> B cells /total lymphocytes in donor product                                                                         | CD19 <sup>+</sup> TLR-9 <sup>hi</sup>                                                         | 0.14         | 0.003 | 0.0003 | 0.02 |
| TLR9 <sup>hi</sup> B cells in total CD19 <sup>+</sup>                                                                                       | CD19 <sup>+</sup> TLR-9 <sup>hi</sup> /CD19 <sup>+</sup>                                      | 0.08         | 1.20  | 0.23   | 5.40 |
| % of iNKT out of lymphocytes                                                                                                                |                                                                                               | 0.32         | 3.3   | 0.3    | 30.1 |
| Total # of iNKT infused /Kg                                                                                                                 |                                                                                               | 0.92         | 0.045 | 0.001  | 0.29 |

| <b>Supplemental Table 2. Association between Donor Cell Population Numbers with Development of Chronic GvHD (Includes all patients that has a death or relapse before the onset of cGvHD or 2 years of follow up)</b> |                            |                              |
|-----------------------------------------------------------------------------------------------------------------------------------------------------------------------------------------------------------------------|----------------------------|------------------------------|
| <b>Percentage cells per total lymphocytes – Independent variable</b>                                                                                                                                                  |                            |                              |
| <b>Variable</b>                                                                                                                                                                                                       | <b>P-value (Wald test)</b> | <b>Hazard Ratio (95% CI)</b> |
| CD56 <sup>bright</sup> NK cells (N = 107)                                                                                                                                                                             |                            |                              |
| Overall cGvHD                                                                                                                                                                                                         | 0.02                       | 0.54 (0.32-0.90)             |
| Extensive cGvHD                                                                                                                                                                                                       | 0.02                       | 0.54 (0.33-0.90)             |
| CD4 <sup>+</sup> T cells IFN $\gamma$ (N = 100)                                                                                                                                                                       |                            |                              |
| Overall cGvHD                                                                                                                                                                                                         | 0.001                      | 0.93 (0.89-0.97)             |
| Extensive cGvHD                                                                                                                                                                                                       | 0.007                      | 0.95 (0.91-0.99)             |

| <b>Supplemental Table 3. Impact of Clinical Variables on interpretation of Donor Cell Population Populations and Development of Chronic GvHD – All evaluable patients</b> |                            |                           |
|---------------------------------------------------------------------------------------------------------------------------------------------------------------------------|----------------------------|---------------------------|
| <b>CD56<sup>bright</sup> NK cell marker</b>                                                                                                                               |                            |                           |
| <b>Variable</b>                                                                                                                                                           | <b>P-value (Wald test)</b> | <b>Odd Ratio (95% CI)</b> |
| Female donor>male recipient vs. others                                                                                                                                    | 0.52                       | 0.70 (0.23-2.08)          |
| TBI versus no TBI                                                                                                                                                         | 0.43                       | 1.72 (0.44-6.61)          |
| Recipient age > median vs. ≤ median                                                                                                                                       | 0.71                       | 0.85 (0.37-1.97)          |
| Donor age > median vs. ≤ median                                                                                                                                           | 0.61                       | 0.80 (0.35-1.86)          |
| AML vs. all other diagnoses                                                                                                                                               | 0.87                       | 0.93 (0.41-2.14)          |
| Transplant related mortality                                                                                                                                              | 0.80                       | 0.89 (0.35-2.2)           |
| Relapse                                                                                                                                                                   | 0.97                       | 1.02 (0.40-2.6)           |
| <b>CD4<sup>+</sup> T cells IFN<math>\gamma</math></b>                                                                                                                     |                            |                           |
| <b>Variable</b>                                                                                                                                                           | <b>P-value (Wald test)</b> | <b>Odd Ratio (95% CI)</b> |
| Female donor>male recipient vs. others                                                                                                                                    | 0.98                       | 1.00 (0.92-1.08)          |
| TBI versus no TBI                                                                                                                                                         | 0.66                       | 1.03 (0.90-1.17)          |
| Recipient age > median vs. ≤ median                                                                                                                                       | 0.90                       | 1.00 (0.94-1.07)          |
| Donor age > median vs. ≤ median                                                                                                                                           | 0.74                       | 1.01 (0.94-1.08)          |
| AML vs. all other diagnoses                                                                                                                                               | 0.52                       | 0.98 (0.92-1.05)          |
| <b>Transplant related mortality</b>                                                                                                                                       | <b>0.01</b>                | <b>0.89 (0.81-0.98)</b>   |
| Relapse                                                                                                                                                                   | 0.75                       | 0.99 (0.91-1.07)          |

TBI = total body irradiation, AML = Acute Myeloid Leukemia
