# Supplementary material for: CD56bright natural killer regulatory cells in filgrastim primed donor blood or marrow products regulate chronic graft-versus-host disease: the Canadian Blood and Marrow Transplant Group randomized 0601 study results
Source: PubMed Central journal article supplement — Haematologica. 2017 Sep 21;102(11):1936–46. doi: 10.3324/haematol.2017.170928 (PMC5664398; doi:10.3324/haematol.2017.170928), 2017-11
Supplement: 2017_170928-Disclosures_and_Contributions.pdf [file 2017_170928-Disclosures_and_Contributions.pdf]

Haematologica  
HAEMATOL/2017/170928  
Version 3

CD56bright NK regulatory cells in filgrastim primed donor blood or marrow products regulate chronic GvHD: CBMTG randomized 0601 study results

Amina Kariminia, Sabine Ivison, Bernard Ng, Jacob Rozmus, Susanna Sung, Avani Varshney, Mahmoud Aljurf, Silvy Lachance, Irwin Walker, Cindy Toze, Jeff Lipton, Stephanie J Lee, Jeff Szer, Richard Doocey, Ian Lewis, Clayton Smith, Naeen Chaudhri, Megan K Levings, Raewyn Broady, Gerald Devins, David Sz wajcer, Ronan Foley, Sara Mostafavi, Steven Pavletic, Donna A. Wall, Stephen Couban, Tony Panzarella, and Kirk R. Schultz

Disclosures: None of the authors have any disclosures in relationship to this publication.

Contributions: SC and KRS contributed equally to the design, execution and analysis of the clinical trial. MA, SL, IW, CT, MR, JHL, SL, JS, RD, IDL, FA, NC, CS and RF reviewed the trial design, contributed to the accrual of the trial and provided review and suggestions for the manuscript. SP contributed significantly in the writing of the paper. AK, DF, RB, ML, and KRS designed and undertook the biological studies. TP was the study statistician and BN and SM provided additional statistical support.
